# Supplementary material for: A data infrastructure reference model with applications: towards realization of a ScienceTube vision with a data replication service
Source: Springer Nature journal article supplement (doi:10.1186/1869-0238-4-1), 2013-01-01
Supplement: 13174_2012_1_MOESM2_ESM.pdf [file 13174_2012_1_MOESM2_ESM.pdf]

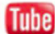

Data wave

Suchen

Kategorien

Video hochladen

Scientific Evaluation of an accurate measurements last year

MediaArtTube 300 Videos Abonnieren

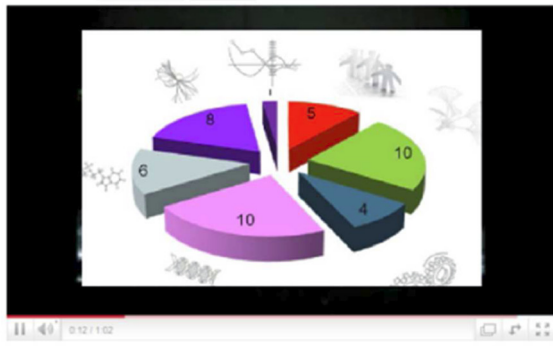

Vorschläge

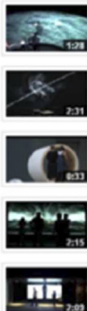

Mag ich

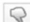

7.557.864 Aufrufe

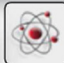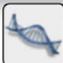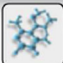

Alle Kommentare (6.291)

Alles anzeigen

Prof. Dr. Known

vor 2 Stunden

Correct. I used this great data in a recent publication supporting this claim, you can see it here: [PaperBerlinTraffic](#)

Citizen from Berlin

vor 9 Stunden

I heard that you have used my data from Berlin to claim that the traffic evolution in this region is...

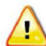

Warning

STORAGE: (RZG)

76% of your data in this storage is unused since 90 days – remove data?

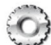

Available Services (Filter #43):

Data-mining service

Workflow service

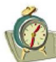

10:46 - CEST Meetings Today

9:00 Steering Group, see [Meeting Minutes](#)

Available Resources (Filter #443):

STORAGE: (JUELICH)

STORAGE: (RZG)

sensor ship #4455

sensor airplane #4711

HPC: (SARA)

HPC: (JUELICH)

HTC: (EGI)

STORAGE: (JUELICH)

STORAGE: (RZG)

Most Viewed Today

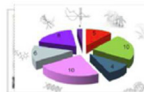

MPI toolset usage

von DieseSchuleRockt

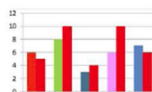

Paper about aging

von albertoson

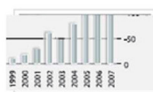

Device #46 data

von ElectronicArtsDE
