# Supplementary material for: A data infrastructure reference model with applications: towards realization of a ScienceTube vision with a data replication service
Source: Springer Nature journal article supplement (doi:10.1186/1869-0238-4-1), 2013-01-01

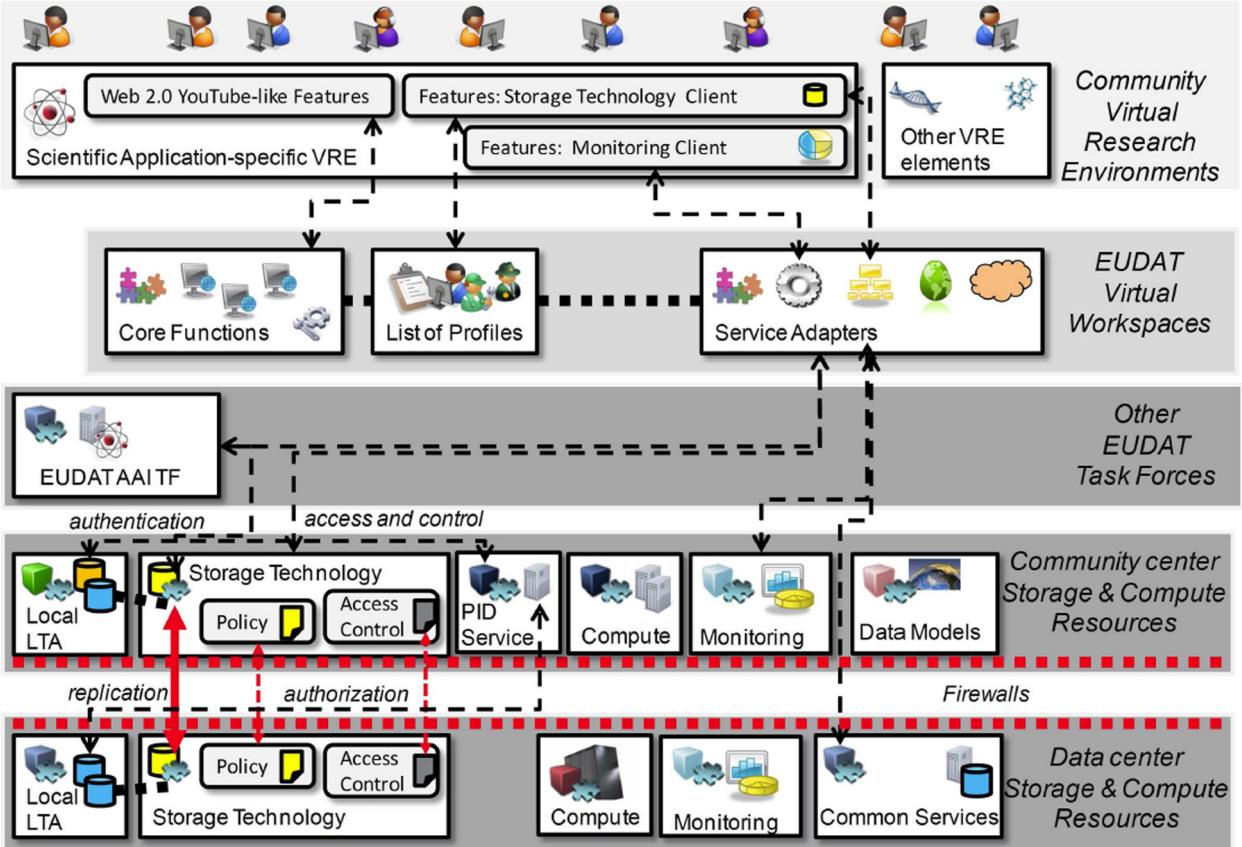

Supplement: 13174_2012_1_MOESM4_ESM.pdf [file 13174_2012_1_MOESM4_ESM.pdf]
