# Supplementary material for: A data infrastructure reference model with applications: towards realization of a ScienceTube vision with a data replication service
Source: Springer Nature journal article supplement (doi:10.1186/1869-0238-4-1), 2013-01-01
Supplement: 13174_2012_1_MOESM6_ESM.pdf [file 13174_2012_1_MOESM6_ESM.pdf]

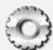

```
{ "1": { "type": "URL", "data": "http://test.example.org/loc1", "timestamp": 1337073321 }, "2": { "type": "CHECKSUM", "data": "abcdef", "timestamp": 1337073321 } }
```

*Example of REST-based message exchange using the JSON format*

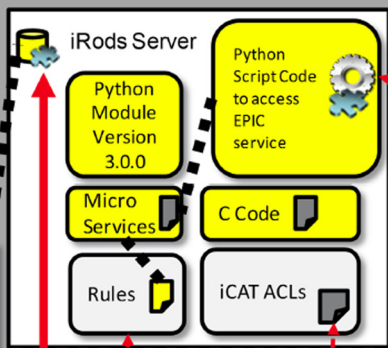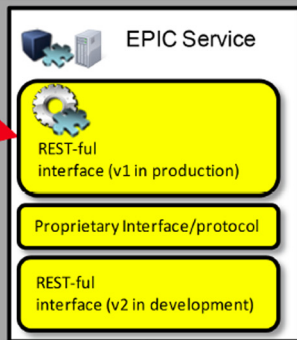

*REST calls to obtain PID and update locations of its different replicas*

*Community center Storage & Compute Resources [detailed view on the infrastructure integration issue of the iRODS and EPIC inter-working]*

*replication*

*authorization*

*Firewalls*

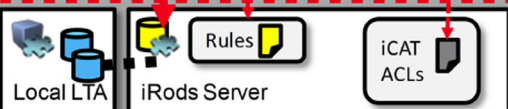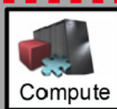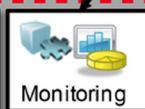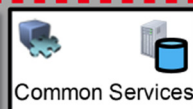

*Data center Storage & Compute Resources*
